# Supplementary material for: The Impact of Intravenous Lidocaine on ICP in Neurological Illness: A Systematic Review
Source: PubMed Central journal article supplement (PMC4581506; doi:10.1155/2015/485802), 2015-09-10
Supplement: 485802.f1.pdf [file 485802.f1.pdf]

## Appendix A: Medline Search Strategy

- 1 brain injury.mp. [mp=ti, ab, sh, hw, tn, ot, dm, mf, dv, kw, bt, id, cc, nm, kf, px, rx, an, ui]
- 2 brain illness.tw.
- 3 neurological injury.mp. [mp=ti, ab, sh, hw, tn, ot, dm, mf, dv, kw, bt, id, cc, nm, kf, px, rx, an, ui]
- 4 neurological injury.tw.
- 5 traumatic brain injury.mp. [mp=ti, ab, sh, hw, tn, ot, dm, mf, dv, kw, bt, id, cc, nm, kf, px, rx, an, ui]
- 6 traumatic brain injury.tw.
- 7 subarachnoid hemorrhage.mp. [mp=ti, ab, sh, hw, tn, ot, dm, mf, dv, kw, bt, id, cc, nm, kf, px, rx, an, ui]
- 8 subarachnoid hemorrhage.tw.
- 9 stroke.mp. [mp=ti, ab, sh, hw, tn, ot, dm, mf, dv, kw, bt, id, cc, nm, kf, px, rx, an, ui]
- 10 stroke.tw.
- 11 brain tumor.mp. [mp=ti, ab, sh, hw, tn, ot, dm, mf, dv, kw, bt, id, cc, nm, kf, px, rx, an, ui]
- 12 brain tumor.tw.

- 13 neurological illness.mp. [mp=ti, ab, sh, hw, tn, ot, dm, mf, dv, kw, bt, id, cc, nm, kf, px, rx, an, ui]
- 14 neurological illness.tw.
- 15 brain illness.mp. [mp=ti, ab, sh, hw, tn, ot, dm, mf, dv, kw, bt, id, cc, nm, kf, px, rx, an, ui]
- 16 brain illness.tw.
- 17 hydrocephalus.mp. [mp=ti, ab, sh, hw, tn, ot, dm, mf, dv, kw, bt, id, cc, nm, kf, px, rx, an, ui]
- 18 hydrocephalus.tw.
- 19 neurological pathology.mp. [mp=ti, ab, sh, hw, tn, ot, dm, mf, dv, kw, bt, id, cc, nm, kf, px, rx, an, ui]
- 20 neurological pathology.tw.
- 21 neurosurgical pathology.mp. [mp=ti, ab, sh, hw, tn, ot, dm, mf, dv, kw, bt, id, cc, nm, kf, px, rx, an, ui]
- 22 neurosurgical pathology.tw.
- 23 neuropathology.mp. [mp=ti, ab, sh, hw, tn, ot, dm, mf, dv, kw, bt, id, cc, nm, kf, px, rx, an, ui]
- 24 neuropathology.tw.
- 25 lidocaine.mp. [mp=ti, ab, sh, hw, tn, ot, dm, mf, dv, kw, bt, id, cc, nm, kf, px, rx, an, ui]
- 26 lidocaine.tw.

- 27 lidocaine hydrochloride.mp. [mp=ti, ab, sh, hw, tn, ot, dm, mf, dv, kw, bt, id, cc, nm, kf, px, rx, an, ui]
- 28 lidocaine hydrochloride.tw.
- 29 lignocaine.mp. [mp=ti, ab, sh, hw, tn, ot, dm, mf, dv, kw, bt, id, cc, nm, kf, px, rx, an, ui]
- 30 lignocaine.tw.
- 31 xylocaine.mp. [mp=ti, ab, sh, hw, tn, ot, dm, mf, dv, kw, bt, id, cc, nm, kf, px, rx, an, ui]
- 32 xylocaine.tw.
- 33 anestacon.mp. [mp=ti, ab, sh, hw, tn, ot, dm, mf, dv, kw, bt, id, cc, nm, kf, px, rx, an, ui]
- 34 anestacon.tw.
- 35 lidoderm.mp. [mp=ti, ab, sh, hw, tn, ot, dm, mf, dv, kw, bt, id, cc, nm, kf, px, rx, an, ui]
- 36 lidoderm.tw.
- 37 xycaine.mp. [mp=ti, ab, sh, hw, tn, ot, dm, mf, dv, kw, bt, id, cc, nm, kf, px, rx, an, ui]
- 38 xycaine.tw.
- 39 esracaine.mp. [mp=ti, ab, sh, hw, tn, ot, dm, mf, dv, kw, bt, id, cc, nm, kf, px, rx, an, ui]
- 40 esracaine.tw.

- 41 alphacaine.mp. [mp=ti, ab, sh, hw, tn, ot, dm, mf, dv, kw, bt, id, cc, nm, kf, px, rx, an, ui]
- 42 alphacaine.tw.
- 43 octocaine.mp. [mp=ti, ab, sh, hw, tn, ot, dm, mf, dv, kw, bt, id, cc, nm, kf, px, rx, an, ui]
- 44 octocaine.tw.
- 45 dalcaine.mp. [mp=ti, ab, sh, hw, tn, ot, dm, mf, dv, kw, bt, id, cc, nm, kf, px, rx, an, ui]
- 46 dalcaine.tw.
- 47 xylesthesin.mp. [mp=ti, ab, sh, hw, tn, ot, dm, mf, dv, kw, bt, id, cc, nm, kf, px, rx, an, ui]
- 48 xylesthesin.tw.
- 49 icp.mp. [mp=ti, ab, sh, hw, tn, ot, dm, mf, dv, kw, bt, id, cc, nm, kf, px, rx, an, ui]
- 50 icp.tw.
- 51 intracranial pressure.mp. [mp=ti, ab, sh, hw, tn, ot, dm, mf, dv, kw, bt, id, cc, nm, kf, px, rx, an, ui]
- 52 intracranial pressure.tw.
- 53 cranial pressure.mp. [mp=ti, ab, sh, hw, tn, ot, dm, mf, dv, kw, bt, id, cc, nm, kf, px, rx, an, ui]
- 54 cranial pressure.tw.

- 55 intracranial hypertension.mp. [mp=ti, ab, sh, hw, tn, ot, dm, mf, dv, kw, bt, id, cc, nm, kf, px, rx, an, ui]
- 56 intracranial hypertension.tw.
- 57 high icp.mp. [mp=ti, ab, sh, hw, tn, ot, dm, mf, dv, kw, bt, id, cc, nm, kf, px, rx, an, ui]
- 58 high icp.tw.
- 59 high pressure.mp. [mp=ti, ab, sh, hw, tn, ot, dm, mf, dv, kw, bt, id, cc, nm, kf, px, rx, an, ui]
- 60 high cranial pressure.tw.
- 61 high pressure.tw.
- 62 high cranial pressure.mp. [mp=ti, ab, sh, hw, tn, ot, dm, mf, dv, kw, bt, id, cc, nm, kf, px, rx, an, ui]
- 63 cerebrospinal fluid pressure.mp. [mp=ti, ab, sh, hw, tn, ot, dm, mf, dv, kw, bt, id, cc, nm, kf, px, rx, an, ui]
- 64 cerebrospinal fluid pressure.tw.
- 65 spinal fluid pressure.mp. [mp=ti, ab, sh, hw, tn, ot, dm, mf, dv, kw, bt, id, cc, nm, kf, px, rx, an, ui]
- 66 spinal fluid pressure.tw.

67 1 or 2 or 3 or 4 or 5 or 6 or 7 or 8 or 9 or 10 or 11 or 12 or 13 or 14 or 15 or 16 or 17 or 18 or 19 or 20 or 21 or 22 or 23 or 24

68 25 or 26 or 27 or 28 or 29 or 30 or 31 or 32 or 33 or 34 or 35 or 36 or 37 or 38 or 39 or 40 or 41 or 42 or 43 or 44 or 45 or 46 or 47 or 48

69 49 or 50 or 51 or 52 or 53 or 54 or 55 or 56 or 57 or 58 or 59 or 60 or 61

70 67 and 68

71 69 and 70

72 remove duplicates from 71
